## National Consumption of Antimalarial Drugs and COVID-19 Deaths Dynamics: An Ecological Study

**Key words:** *Covid-19, antimalarial drugs, hydroxychloroquine, ARIMA, deaths dynamics.*

**Short Title :** *Hydroxychloroquine and the International Mortality Dynamics of Covid-19*

**Abstract:** COVID-19 (Coronavirus Disease-2019) is an international public health problem with a high rate of severe clinical cases. Several treatments are currently being tested worldwide. This paper focuses on anti-malarial drugs such as chloroquine or hydroxychloroquine. We compare the dynamics of COVID-19 daily deaths in countries using anti-malaria drugs as a treatment from the start of the epidemic versus countries that do not, the day of the 3rd death and the following 10 days. We then use a ARIMA modeling to realize a short-term forecast of deaths dynamics for each group. We show that the first group have a much slower dynamic in daily deaths that the second group. This ecological study is of course only one additional piece of evidence in the debate regarding the efficiency of anti-malaria drugs, and it is also limited as the two groups certainly have other systemic differences in the way they responded to the pandemic, in the way they report death or in their population that better explain differences in dynamics. Nevertheless, the difference in dynamics of daily deaths is so striking that we believe it is useful to present these results as a clue in the researches about the efficiency of hydroxychloroquine. In the end, this data might ultimately be either a piece of evidence in favor of anti-malaria drugs or a stepping stone in understanding further what other ecological aspects place a role in the dynamics of COVID-19 deaths.

30

Maxime Izoulet, CEMI-EHESS

214 boulevard Raspail

Paris, 75014

[Maxime.izoulet@gmail.com](mailto:Maxime.izoulet@gmail.com)

35

## 1. Introduction

COVID-19 (Coronavirus Disease-2019) is an international public health problem with a high rate of severe clinical cases. Several treatments are currently being tested worldwide. This paper focuses on anti-malarial drugs such as chloroquine or hydroxychloroquine, which have been currently reviewed by a systematic study as a good potential candidate<sup>1</sup> and that has been reported as the most used treatment by a recent survey of physicians<sup>2</sup>. We compare the dynamics of COVID-19 daily deaths in countries using anti-malaria drugs as a treatment from the start of the epidemic versus countries that do not, the day of the 3rd death and the following 10 days. We show that the first group have a much slower dynamic in daily deaths than the second group. This ecological study is of course only one additional piece of evidence in the debate regarding the efficiency of anti-malaria drugs, and it is also limited as the two groups certainly have other systemic differences in the way they responded to the pandemic, in the way they report death or in their population that better explain differences in dynamics (systematic differences that may also explain their choice to rely on anti-malaria drugs in the first place). Nevertheless, the difference in dynamics of daily deaths is so striking that we believe that the urgency context commands presenting the results before delving into further analysis. In the end, this data might ultimately be either a piece of evidence in favor of anti-malaria drugs or a stepping stone in understanding further what other ecological aspects play a role in the dynamics of COVID-19 deaths.

50

55

---

<sup>1</sup> Cortegiani A, Ingoglia G, Ippolito M, Giarratano A, Einav S, *A systematic review on the efficacy and safety of chloroquine for the treatment of COVID-19*. Journal of Critical Care, 10 March 2020, available online:

[https://www.ncbi.nlm.nih.gov/pubmed/32173110?fbclid=IwAR3inu2KMU9p8a1z\\_\\_S3ucf2WWeFrXKzazXFclthX6TcOakbqseDzgeB0c](https://www.ncbi.nlm.nih.gov/pubmed/32173110?fbclid=IwAR3inu2KMU9p8a1z__S3ucf2WWeFrXKzazXFclthX6TcOakbqseDzgeB0c)

<sup>2</sup> Richardson Valerie, *Hydroxychloroquine rated 'most effective therapy' by doctors for coronavirus: Global survey*. The Washington Times, 2 April 2020. Available online:

<https://www.washingtontimes.com/news/2020/apr/2/hydroxychloroquine-rated-most-effective-therapy-do/?fbclid=IwAR2e0CFgalMskxIYyAS2VFBmFGQeFyEyT3AtiASUT6O2FB9Xo5J3zOHKbcQ>

60

## 2. Method

65

In this study, we set up two groups of 16 countries and study the dynamics of the number of deaths between the day of the 3rd death and the following 10 days. The first group is made up of countries that we know use or produce chloroquine or hydroxychloroquine on a massive scale during this period. The second group consists of countries that did not use or produce chloroquine or hydroxychloroquine in large quantities during the period under consideration. When we calculate the averages of each of the two groups, we find very marked differences in their temporal dynamics (see results).

70

75

We then use Box and Jenkins' methodology to apply ARIMA (Auto Regressive Integrated Moving Average) models to these time series, compare the model parameters obtained for each group of countries, and make forecasts of the means of the two groups from these results. Unsurprisingly, the ARIMA models predict a stabilization of the number of deaths for the group of countries using chloroquine and a large increase for the group of countries not using it. The 60 countries most affected by the epidemic (in terms of number of cases) were studied one by one in descending order to determine whether or not they were conducting a national strategy for the large-scale use or production of chloroquine at the beginning of the epidemic in the country (around the 3rd death)<sup>3</sup>. If there was no evidence of such a strategy, or even if sources indicated a strategy to the contrary, the country was classified in the "control group" group, until a panel of 16 countries was obtained in order to have a large sample, provided that daily death data were available for the 10 days following the third death. The second group was constituted with the 16 countries among the 60 most affected in terms of number of cases for which sources indicate the massive use or production of chloroquine at the beginning of the epidemic in the country (around the 3rd death), provided that they have daily death data for the 10 days following the 3rd death. The different groups of countries were constituted according to the information available in the international press on their use or mass production of such drugs over the period under consideration. 16 countries thus constitute each of the two groups (see figure 1 and figure 2).

80

85

90

---

<sup>3</sup> List available at the 13<sup>th</sup> of April (see detailed list in annex):  
<https://www.worldometers.info/coronavirus/#countries>

For each of the two groups, the number of daily deaths is noted each day from the 3rd death in the country and the following 10 days. Then the average of the daily deaths is established for each day for each group of countries. For the group without chloroquine, an average is also calculated by removing China and another by removing China and Spain, as these two countries have the two most explosive time series and may be seen as outliers. The trends do not change substantially.

### 100      **3.      Results**

The graphical projection of the mean curves indicates a divergence in the dynamics of the daily death curves of the two groups of countries which is very clear for the period studied (i.e. from the beginning of the epidemic) (see figure 3).

105

The average curve for countries using antimalarial drugs is rather stable or slightly increasing, the curve for countries not using those treatments is on the contrary strongly increasing. Moreover, the simple regression curves clearly indicate this difference in trend. The average of countries with widespread chloroquine use is fairly well modelled ( $R^2 = 0,73$ ) by a slightly ascending polynomial regression, whereas the average of countries without chloroquine is very well modelled ( $R^2 = 0,98$ ) by an exponential regression. Modelling and forecasting using ARIMA (Auto Regressive Integrated Moving Average) models are widely used in time series econometrics. Introduced by Box and Jenkins, they allow an excellent modelling of time series based on the data themselves and without including any theoretical *a priori* on these data. They therefore allow excellent modelling of the internal dynamics of these data and are highly predictive, which tends to validate their relevance. They are widely used in macroeconomics and finance, but also in many other fields, in biology, geophysics, astronomy, etc...

115  
120      Let's say an ARIMA ( $p,d,q$ ) process:

$$(1.1) \quad (1 - L)^d X_t = \frac{\theta(L)}{\phi(L)} \varepsilon_t$$

125 With  $\phi_i (i = 1, \dots, p)$  the reals corresponding to the autoregressive coefficients,  
 $\theta_j (j = 1, \dots, q)$  the reals corresponding to the moving average coefficients, of the  
order of integration  $d$  and  $(\varepsilon_t \sim WN(0, \sigma^2))$  the residuals behaving as white noise, with  
zero mean and variance  $\sigma^2$ , constant and less than infinity.

130 Following Box and Jenkins' methodology for specifying, estimating and validating the  
ARIMA modelling, the application to the mean time series of the two groups of  
countries using the R<sup>4</sup> software gives the results of **the figure 4**.

135 The Akaike Information Criterion (AIC), for each model selected, is the best relative  
to other alternative models that were also calculated in this study, i.e. it is closest to  
zero, indicating the quality of the model specification. This criterion is calculated as  
follows:

140 (1.2) 
$$AIC = \log \widehat{\sigma_\varepsilon^2} + \frac{2(p+q)}{T}$$

This modelling then allows a 10-day forecast of the evolution of the death dynamics  
for each of the two groups of countries. We obtain the results in  $R$  (the first column  
145 shows the number of days after the first day with 3 deaths, the second column shows  
the estimated forecast values, the third and fourth columns show the low and high  
values of the 80% confidence intervals of the forecast, and the fifth and sixth columns  
show the 95% confidence intervals)

-For the "antimalarial drugs group", **see figure 5 and figure 6**.

150 -For the group "without chloroquine", **see figure 7 and figure 8**.

Forecasts reinforce early visual observations. For the group of countries "antimalarial  
drugs group", the forecast of the ARIMA model (1,0,1) indicates a stabilization of the  
death curve. For the "control group" countries, the ARIMA model's forecast (0,2,0)

---

<sup>4</sup> Hyndman R. *et al.*, *Forecasting Functions for Time Series and Linear Models*, 2020.  
<https://cran.r-project.org/web/packages/forecast/forecast.pdf>

155 indicates a very significant acceleration in the number of deaths. It should be noted  
that beyond D+10, such an acceleration is already visible in the actual data of many  
countries for which this statistic is available.

To validate model's specification, residuals distribution is then tested, in order to  
160 control they behave as a white noise, i.e. they are not autocorrelated. This verification  
is done through the autocorrelations of residuals plotting in  $R$ .

Autocorrelation function is a  $X_t$  process of  $k$  order that can be writing as follow :

$$(1.3) \quad \rho_k = \frac{\frac{1}{T} \sum_{t=1}^{T-k} (X_t - \bar{X})(X_{t+k} - \bar{X})}{\frac{1}{T} \sum_{t=1}^T (X_t - \bar{X})^2}$$

165

For ARIMA (1,0,1) applied to “antimalarial drugs group”, we obtain autocorrelations  
of **the figure 9**.

No autocorrelation is significant, residuals are behaving as a white noise, it indicates  
the validity of the model.

170

For ARIMA (0,2,0) applied to “control group”, we obtain autocorrelations of **the  
figure 10**.

In the same way, no residuals autocorrelation is significant. Residuals are behaving as  
a white noise, model specification and estimation is then validated.

175

180

185

#### 4. Limitations

190

Introduced in the 1970s by Box and Jenkins<sup>5</sup>, ARIMA models are so-called a-theoretical models<sup>6</sup>, which seek predictive efficiency by focusing on the past data of a time series, without worrying about the causes of these past data. They are therefore not able to explain all the explanatory variables of a temporal evolution, but they are very effective in describing the internal dynamics of the evolution. Nor are they an instrument of proof, but rather a statistical index updating a dynamic. Here they make it possible to highlight two very distinct dynamics from the very first days of the outbreak, which is very useful since this highly contagious epidemic has a strong internal dynamic. They have been already used for modelling the spread of the epidemic, notably in India<sup>7</sup>.

195

200

Of course, they do not model, and do not claim to model, all the parameters that explain a temporal evolution. On the other hand, they are often highly predictive<sup>8</sup> and outweigh many models with more explanatory variables, which is a very important criterion of overall model validity. It should also be noted that while many sources exist to determine the health action of governments, including their use or mass production of chloroquine from the onset of the crisis, quantitative data are lacking and do not allow for more in-depth temporal analyses and causality tests. There also might be systematic differences between the two groups - in particular political differences, urban differences or differences in other strategy aspects such as testing. There is strong evidence for places like South Korea and Japan that mass testing is an effective strategy to control the epidemic, and our study might be a proxy for testing strategies. All these aspects should be examined in a late study.

205

210

---

<sup>5</sup> Box, George; Jenkins, Gwilym (1970). *Time Series Analysis: Forecasting and Control*. San Francisco: Holden-Day, 1970.

<sup>6</sup> Gujarati Damodar N., *Econométrie*, Traduction de la quatrième édition américaine par Bernard Bernier, Collection Ouvertures économiques, éditions de Boeck, 2012.

<sup>7</sup> Choudhary Ishan, *Forecasting COVID-19 cases in India: How many cases are going to get detected by 7th April 2020 in India?* Medium, 29 march 2020, link: <https://towardsdatascience.com/forecasting-covid-19-cases-in-india-c1c410cfc730>

<sup>8</sup> Lardic S. et Mignon V. : *Econométrie des séries temporelles macroéconomiques et financières*, Economica, 2002.

215

## 5. Conclusion

We find major differences in death rates, with countries using antimalarial drugs faring better than those which do not. This analysis is of course only one additional  
220 piece of evidence in the debate regarding the efficiency of anti-malaria drugs, and it is also limited as the two groups certainly have other systemic differences in the way they responded to the pandemic. Nevertheless, the differences in dynamics is so striking that we believe that the urgency context commands presenting this ecological study before delving into further analysis. In the end, this data might ultimately be  
225 either a piece of evidence in favor or anti-malaria drugs or a stepping stone in understanding further what other ecological aspects place a role in the dynamics of COVID-19 deaths.

230

235

240

245



250           **Acknowledgement:** I would like to thank all the colleagues of my laboratory (CEMI-EHES, Paris) for their support and help. I'm also grateful to *Institut Européen d'Etudes du Développement* (IEED) in Paris.

255           **Statement of Ethics:** This study has been conducted ethically, in accordance with the World Medical Association Declaration of Helsinki.

**Disclosure Statement:** The author has no conflicts of interest to declare.

260           **Funding Sources:** The author has no funding sources.

**Author Contributions:** Maxime Izoulet has realized the integrality of this paper.

265

270

275

280

## Bibliography:

285

Box, George; Jenkins, Gwilym (1970). *Time Series Analysis: Forecasting and Control*.

San Francisco: Holden-Day, 1970.

Charpentier A. (2009), *Différencier (indéfiniment) les séries temporelles ?*

290

<http://freakonometrics.hypotheses.org/1876>, 2009.

Choudhary Ishan (2020), *Forecasting COVID-19 cases in India: How many cases are going to get detected by 7th April 2020 in India?* Medium, 29 march 2020,

link:

<https://towardsdatascience.com/forecasting-covid-19-cases-in-india-c1c410cfc730>

295

Gujarati Damodar N. (2012), *Econométrie*, Traduction de la quatrième édition américaine par Bernard Bernier, Collection Ouvertures économiques, éditions de Boeck.

Granger C.W.J. (2003), *Time series analysis, cointegration and applications*, Nobel

300

Lecture.

Hamilton J. D. (1994), *Time Series Analysis*, Princeton University Press.

Hayek F.A. (2007), *La théorie des phénomènes complexes*, in *Essais de philosophie, de*

*science politique et d'économie*, traduction française Christophe Piton,

305

Bibliothèque classique de la liberté.

Lardic S. et Mignon V. (2002) : *Econométrie des séries temporelles macroéconomiques et financières*, Economica, 2002.

Mandelbrot, B., Hudson R. L. (2008), *The (Mis)Behaviour of Markets: A Fractal View of Risk, Ruin and Reward*, Profile Book, 2008.

310

Mullard A. (2012), *Drug repurposing programmes get lift off*

Nat Rev Drug Discov, pp. 505-506, 10.1038/nrd3776.

Pfaff B. (2020), *VAR Modelling*.

<https://cran.rproject.org/web/packages/vars/vars.pdf>

Hyndman R. *et al.* (2020), *Forecasting Functions for Time Series and Linear Models*,

315

<https://cran.r-project.org/web/packages/forecast/forecast.pdf>

Veenstra J.Q. (2018), *Fractional ARIMA (and Other Long Memory) Time Series Modeling*, <https://cran.r-project.org/web/packages/arfima/arfima.pdf>

Zhou P., Yang X.L., Wang X.G. , Hu B. , Zhang L. , Zhang W. (2020), *et al. A pneumonia outbreak associated with a new coronavirus of probable bat origin*  
320 Nature (2020 Feb 3), 10.1038/s41586-020-2012-7

### Figure Legend

325 **Figure 1:** Number of daily deaths after day with 3 deaths, “antimalarial drugs group”

**Figure 2:** Number of daily deaths after day with 3 deaths, “control group”

**Figure 3:** Means of the number of daily deaths for each group

330

**Figure 4:** ARIMA parameters specifications and estimations for each group

**Figure 5:** Forecasting values and confidence intervals for an ARIMA (1,0,1) process  
335 applied to “antimalarial drugs group”

**Figure 6:** Forecasts plot for “antimalarial drugs group”

**Figure 7:** Forecasting values and confidence intervals for an ARIMA (0,2,0) process  
340 applied to “control group”

**Figure 8:** Forecasts plot for “control group”

**Figure 9:** Autocorrelations of residuals for ARIMA (1,0,1) applied to “antimalarial  
345 drugs group”

**Figure 10:** Autocorrelations of residuals for ARIMA (0,2,0) applied to “control  
group”,

350

355

**Potential international reviewers:**

360

No potential reviewers have been selected for this article.

365

370

375

380

385

390

395

400

405

**Annexes**

| <b>All</b>              | Europe             | North America    | Asia                | South America     | / |
|-------------------------|--------------------|------------------|---------------------|-------------------|---|
| <b>Country, Other</b>   | <b>Total Cases</b> | <b>New Cases</b> | <b>Total Deaths</b> | <b>New Deaths</b> |   |
| World                   | 1,866,654          | +14,397          | 115,269             | +1,075            |   |
| <a href="#">USA</a>     | 560,433            | +133             | 22,115              | +10               |   |
| <a href="#">Spain</a>   | 169,496            | +2,665           | 17,489              | +280              |   |
| <a href="#">Italy</a>   | 156,363            |                  | 19,899              |                   |   |
| <a href="#">France</a>  | 132,591            |                  | 14,393              |                   |   |
| <a href="#">Germany</a> | 127,854            |                  | 3,022               |                   |   |
| <a href="#">UK</a>      | 84,279             |                  | 10,612              |                   |   |
| <a href="#">China</a>   | 82,160             | +108             | 3,341               | +2                |   |
| <a href="#">Iran</a>    | 73,303             | +1,617           | 4,585               | +111              |   |

410

|                             |        |        |       |      |
|-----------------------------|--------|--------|-------|------|
| <a href="#">Turkey</a>      | 56,956 |        | 1,198 |      |
| <a href="#">Belgium</a>     | 30,589 | +942   | 3,903 | +303 |
| <a href="#">Netherlands</a> | 26,551 | +964   | 2,823 | +86  |
| <a href="#">Switzerland</a> | 25,503 | +88    | 1,117 | +11  |
| <a href="#">Canada</a>      | 24,383 |        | 717   |      |
| <a href="#">Brazil</a>      | 22,318 | +126   | 1,241 | +18  |
| <a href="#">Russia</a>      | 18,328 | +2,558 | 148   | +18  |
| <a href="#">Portugal</a>    | 16,934 | +349   | 535   | +31  |
| <a href="#">Austria</a>     | 13,998 | +53    | 368   | +18  |
| <a href="#">Israel</a>      | 11,235 | +90    | 110   | +7   |
| <a href="#">Sweden</a>      | 10,948 | +465   | 919   | +20  |
| <a href="#">S. Korea</a>    | 10,537 | +25    | 217   | +3   |
| <a href="#">Ireland</a>     | 9,655  |        | 334   |      |
| <a href="#">India</a>       | 9,240  | +35    | 331   |      |
| <a href="#">Peru</a>        | 7,519  |        | 193   |      |
| <a href="#">Ecuador</a>     | 7,466  |        | 333   |      |
| <a href="#">Japan</a>       | 7,370  |        | 123   |      |
| <a href="#">Chile</a>       | 7,213  |        | 80    |      |

|                              |       |      |     |     |
|------------------------------|-------|------|-----|-----|
| <a href="#">Poland</a>       | 6,674 |      | 232 |     |
| <a href="#">Romania</a>      | 6,633 | +333 | 318 | +2  |
| <a href="#">Norway</a>       | 6,525 |      | 128 |     |
| <a href="#">Australia</a>    | 6,359 | +46  | 61  | +2  |
| <a href="#">Denmark</a>      | 6,318 | +144 | 285 | +12 |
| <a href="#">Czechia</a>      | 5,991 |      | 139 | +1  |
| <a href="#">Pakistan</a>     | 5,374 | +144 | 93  | +2  |
| <a href="#">Philippines</a>  | 4,932 | +284 | 315 | +18 |
| <a href="#">Malaysia</a>     | 4,817 | +134 | 77  | +1  |
| <a href="#">Mexico</a>       | 4,661 | +442 | 296 | +23 |
| <a href="#">Indonesia</a>    | 4,557 | +316 | 399 | +26 |
| <a href="#">Saudi Arabia</a> | 4,462 |      | 59  |     |
| <a href="#">UAE</a>          | 4,123 |      | 22  |     |
| <a href="#">Serbia</a>       | 3,630 |      | 80  |     |
| <a href="#">Panama</a>       | 3,400 |      | 87  |     |
| <a href="#">Luxembourg</a>   | 3,281 |      | 66  |     |
| <a href="#">Qatar</a>        | 3,231 | +252 | 7   |     |
| <a href="#">Ukraine</a>      | 3,102 | +325 | 93  | +10 |

|                                           |              |             |            |            |
|-------------------------------------------|--------------|-------------|------------|------------|
| <a href="#"><u>Finland</u></a>            | <b>3,064</b> | <b>+90</b>  | <b>59</b>  | <b>+3</b>  |
| <a href="#"><u>Dominican Republic</u></a> | <b>2,967</b> |             | <b>173</b> |            |
| <a href="#"><u>Belarus</u></a>            | <b>2,919</b> | <b>+341</b> | <b>29</b>  | <b>+3</b>  |
| <a href="#"><u>Colombia</u></a>           | <b>2,776</b> |             | <b>109</b> |            |
| <a href="#"><u>Thailand</u></a>           | <b>2,579</b> | <b>+28</b>  | <b>40</b>  | <b>+2</b>  |
| <a href="#"><u>Singapore</u></a>          | <b>2,532</b> |             | <b>8</b>   |            |
| <a href="#"><u>Argentina</u></a>          | <b>2,208</b> | <b>+66</b>  | <b>95</b>  | <b>+5</b>  |
| <a href="#"><u>South Africa</u></a>       | <b>2,173</b> |             | <b>25</b>  |            |
| <a href="#"><u>Greece</u></a>             | <b>2,114</b> |             | <b>98</b>  |            |
| <a href="#"><u>Egypt</u></a>              | <b>2,065</b> |             | <b>159</b> |            |
| <a href="#"><u>Algeria</u></a>            | <b>1,914</b> |             | <b>293</b> |            |
| <a href="#"><u>Morocco</u></a>            | <b>1,746</b> | <b>+85</b>  | <b>120</b> | <b>+2</b>  |
| <a href="#"><u>Iceland</u></a>            | <b>1,701</b> |             | <b>8</b>   |            |
| <a href="#"><u>Moldova</u></a>            | <b>1,662</b> |             | <b>35</b>  | <b>+4</b>  |
| <a href="#"><u>Croatia</u></a>            | <b>1,650</b> | <b>+50</b>  | <b>25</b>  | <b>+2</b>  |
| <a href="#"><u>Hungary</u></a>            | <b>1,458</b> | <b>+48</b>  | <b>109</b> | <b>+10</b> |

425

**Annex 1: list of the 60 countries with the most Covid 19 total cases on 13<sup>th</sup> April 2020 (see note 3 of this study) from <https://www.worldometers.info/coronavirus/#countries>**



# National Consumption of Antimalarial Drugs and COVID-19 Deaths Dynamics: An Ecological Study

Maxime Izoulet

Image File

# Figure 1: Number of daily deaths after day with 3 deaths, “antimalarial drugs group”

| antimalarial drugs group | Number of Daily Deaths   |            |            |            |            |            |            |            |            |            |
|--------------------------|--------------------------|------------|------------|------------|------------|------------|------------|------------|------------|------------|
|                          | D=Day of the third death | D+1        | D+2        | D+3        | D+4        | D+5        | D+6        | D+7        | D+8        | D+9        |
| Burkina Faso             | 1                        | 1          | 0          | 1          | 2          | 2          | 2          | 4          | 2          | 0          |
| Dominican Republic       | 1                        | 0          | 0          | 3          | 4          | 0          | 10         | 8          | 11         | 3          |
| Guatemala                | 2                        | 2          | 0          | 1          | 1          | 2          | 4          | 5          | 1          | 1          |
| Guinea                   | 2                        | 1          | 0          | 1          | 0          | 1          | 4          | 3          | 2          | 2          |
| Indonesia                | 1                        | 0          | 1          | 1          | 0          | 2          | 3          | 0          | 2          | 8          |
| Malaysia                 | 3                        | 1          | 0          | 0          | 2          | 12         | 6          | 7          | 6          | 10         |
| Moldova                  | 1                        | 5          | 2          | 4          | 2          | 4          | 3          | 3          | 1          | 8          |
| Nicaragua                | 1                        | 0          | 1          | 0          | 1          | 1          | 5          | 12         | 2          | 1          |
| Pakistan                 | 1                        | 0          | 2          | 1          | 1          | 1          | 1          | 2          | 1          | 2          |
| Paraguay                 | 2                        | 0          | 3          | 0          | 2          | 1          | 5          | 3          | 7          | 3          |
| Russia                   | 2                        | 0          | 1          | 0          | 4          | 1          | 8          | 7          | 6          | 4          |
| Sri Lanka                | 1                        | 3          | 1          | 2          | 3          | 3          | 7          | 5          | 3          | 8          |
| South Korea              | 4                        | 2          | 3          | 1          | 1          | 3          | 1          | 4          | 7          | 4          |
| Tanzania                 | 2                        | 0          | 1          | 1          | 0          | 2          | 1          | 0          | 1          | 1          |
| Togo                     | 1                        | 2          | 1          | 2          | 0          | 1          | 1          | 0          | 1          | 1          |
| Venezuela                | 1                        | 0          | 0          | 0          | 0          | 0          | 2          | 0          | 0          | 4          |
| <b>Total</b>             | <b>26</b>                | <b>17</b>  | <b>16</b>  | <b>18</b>  | <b>23</b>  | <b>36</b>  | <b>63</b>  | <b>63</b>  | <b>53</b>  | <b>60</b>  |
| <b>1 by country</b>      | <b>1,6</b>               | <b>1,1</b> | <b>1,0</b> | <b>1,1</b> | <b>1,4</b> | <b>2,3</b> | <b>3,9</b> | <b>3,9</b> | <b>3,3</b> | <b>3,8</b> |

# Figure 2: Number of daily deaths after day D with 3 deaths, “control group”.

| Control group                | D=Day of the third death | Number of Daily Deaths |     |     |     |     |     |      |      |      |      |
|------------------------------|--------------------------|------------------------|-----|-----|-----|-----|-----|------|------|------|------|
|                              |                          | D+1                    | D+2 | D+3 | D+4 | D+5 | D+6 | D+7  | D+8  | D+9  | D+10 |
| Austria                      | 2                        | 1                      | 0   | 2   | 0   | 2   | 8   | 5    | 7    | 3    |      |
| Belgium                      | 3                        | 0                      | 0   | 1   | 0   | 6   | 0   | 4    | 7    | 16   |      |
| Brazil                       | 3                        | 3                      | 4   | 7   | 7   | 9   | 12  | 13   | 18   | 15   |      |
| Canada                       | 3                        | 4                      | 1   | 3   | 0   | 7   | 1   | 4    | 2    | 10   |      |
| China                        | 8                        | 16                     | 15  | 24  | 26  | 26  | 38  | 43   | 46   | 45   |      |
| France                       | 1                        | 1                      | 0   | 3   | 2   | 7   | 3   | 11   | 3    | 15   |      |
| Germany                      | 1                        | 3                      | 2   | 1   | 4   | 4   | 9   | 2    | 16   | 24   |      |
| Iran                         | 2                        | 2                      | 2   | 4   | 4   | 3   | 7   | 8    | 9    | 11   |      |
| Italy                        | 1                        | 4                      | 4   | 1   | 5   | 4   | 8   | 12   | 11   | 27   |      |
| Netherlands                  | 2                        | 1                      | 0   | 1   | 0   | 5   | 2   | 8    | 4    | 19   |      |
| Spain                        | 1                        | 5                      | 2   | 7   | 13  | 6   | 19  | 31   | 47   | 63   |      |
| Sweden                       | 1                        | 4                      | 1   | 2   | 1   | 5   | 4   | 1    | 6    | 13   |      |
| Switzerland                  | 1                        | 1                      | 3   | 4   | 2   | 1   | 5   | 8    | 6    | 10   |      |
| Turkey                       | 2                        | 5                      | 12  | 9   | 7   | 7   | 15  | 16   | 17   | 16   |      |
| United Kingdom               | 1                        | 2                      | 1   | 2   | 2   | 1   | 10  | 14   | 20   | 16   |      |
| United States                | 5                        | 3                      | 2   | 1   | 3   | 4   | 3   | 4    | 4    | 8    |      |
| Overall                      | 37                       | 55                     | 49  | 72  | 76  | 97  | 144 | 184  | 223  | 311  |      |
| Mean by country              | 2,3                      | 3,4                    | 3,1 | 4,5 | 4,8 | 6,1 | 9,0 | 11,5 | 13,9 | 19,4 |      |
| Mean without China           | 1,9                      | 2,6                    | 2,3 | 3,2 | 3,3 | 4,7 | 7,1 | 9,4  | 11,8 | 17,7 |      |
| Mean without China and Spain | 2,0                      | 2,4                    | 2,3 | 2,9 | 2,6 | 4,6 | 6,2 | 7,9  | 9,3  | 14,5 |      |

medRxiv preprint doi: <https://doi.org/10.1101/2020.04.18.20069875>; this version posted May 28, 2020. The copyright holder for this preprint (which was not certified by peer review) is the author/funder, who has granted medRxiv a license to display the preprint in perpetuity. It is made available under a CC-BY-NC-ND 4.0 International license.

# Figure 3: Means of the number of daily deaths for each group

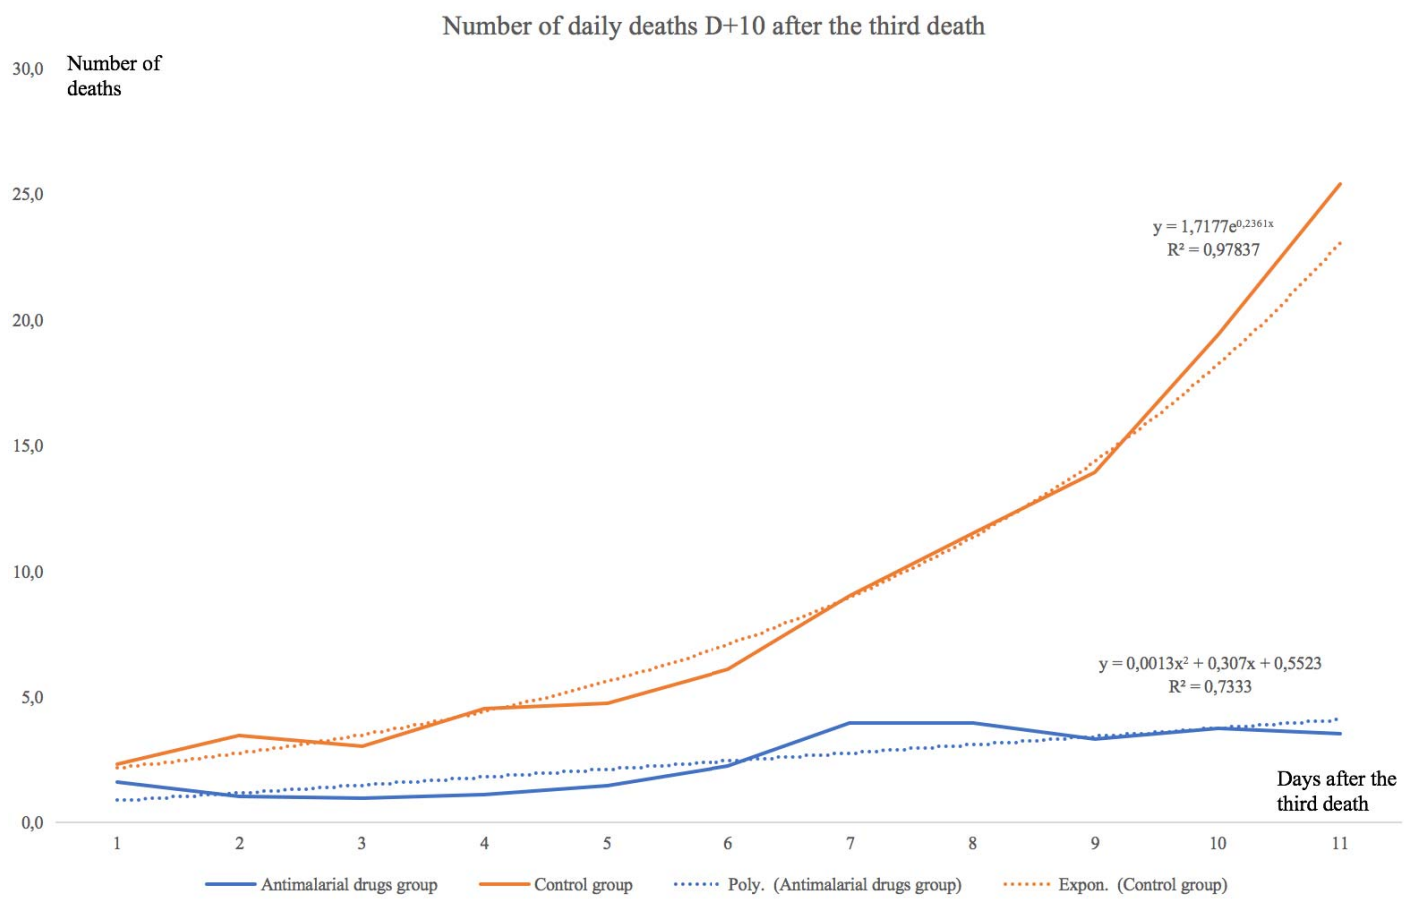

# Figure 4: ARIMA parameters specification and estimations for each group

|                          | Selected models | $\phi_1$ | $d$ | $\theta_1$ | $\sigma^2$ | Log likelihood |
|--------------------------|-----------------|----------|-----|------------|------------|----------------|
| Antimalarial drugs group | ARIMA (1,0,1)   | 0,6501   | 0   | 1          | 0,2077     | -8,95          |
| Control group            | ARIMA (0,2,0)   | -        | 2   | -          | 2,183      | -16,28         |

# Figure 6.1: Forecasting values and confidence intervals for an ARIMA (1,0,1) process applied to “antimalarial drugs group”

```
> forecast(arima(antimalarialdrugsgroup,order=c(1,0,1)))
```

|    | Point Forecast | Lo 80    | Hi 80    | Lo 95     | Hi 95    |
|----|----------------|----------|----------|-----------|----------|
| 12 | 3.023685       | 2.414098 | 3.633271 | 2.0914030 | 3.955966 |
| 13 | 2.839780       | 1.707117 | 3.972444 | 1.1075207 | 4.572040 |
| 14 | 2.720230       | 1.428703 | 4.011758 | 0.7450094 | 4.695451 |
| 15 | 2.642515       | 1.289449 | 3.995581 | 0.5731786 | 4.711851 |
| 16 | 2.591994       | 1.213749 | 3.970240 | 0.4841493 | 4.699839 |
| 17 | 2.559153       | 1.170404 | 3.947902 | 0.4352443 | 4.683062 |
| 18 | 2.537804       | 1.144640 | 3.930968 | 0.4071433 | 4.668464 |
| 19 | 2.523925       | 1.128900 | 3.918951 | 0.3904182 | 4.657433 |
| 20 | 2.514904       | 1.119092 | 3.910715 | 0.3801944 | 4.649613 |
| 21 | 2.509039       | 1.112896 | 3.905182 | 0.3738219 | 4.644256 |

# Figure 6: Forecasts plot for “antimalarial drugs group”

Forecasts from ARIMA(1,0,1) with non-zero mean

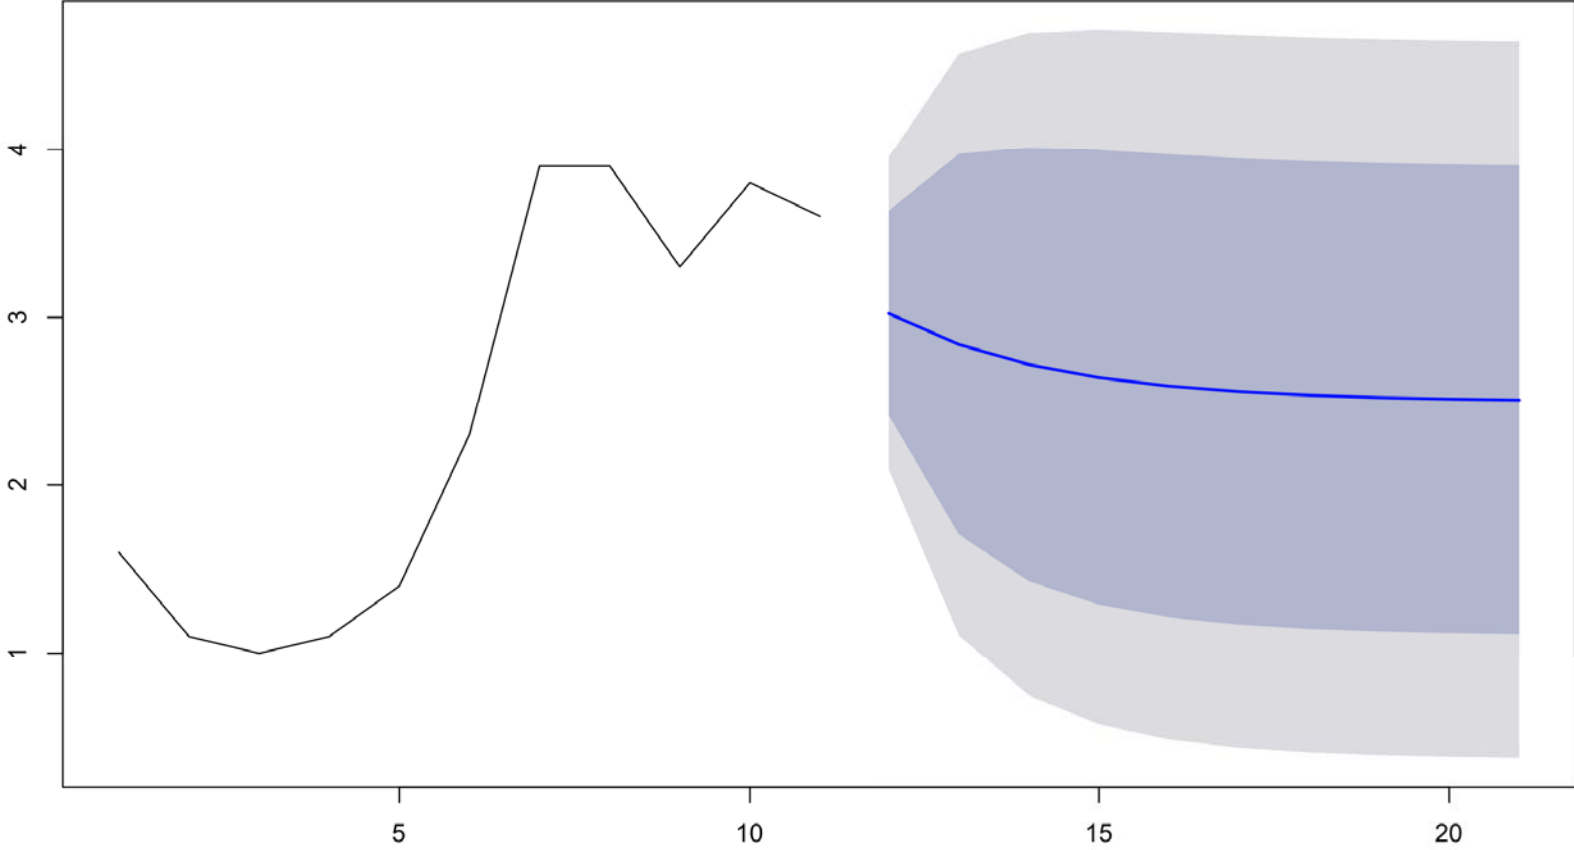

# Figure 7: Forecasting values and confidence intervals for an ARIMA (0,2,0) process applied to “control group”

```
> forecast(arima(controlgroup, order=c(0,2,0)))
```

|    | Point Forecast | Lo 80    | Hi 80     | Lo 95    | Hi 95     |
|----|----------------|----------|-----------|----------|-----------|
| 12 | 31.4           | 29.50637 | 33.29363  | 28.50394 | 34.29606  |
| 13 | 37.4           | 33.16571 | 41.63429  | 30.92420 | 43.87580  |
| 14 | 43.4           | 36.31467 | 50.48533  | 32.56392 | 54.23608  |
| 15 | 49.4           | 39.02814 | 59.77186  | 33.53761 | 65.26239  |
| 16 | 55.4           | 41.35643 | 69.44357  | 33.92222 | 76.87778  |
| 17 | 61.4           | 43.33588 | 79.46412  | 33.77331 | 89.02669  |
| 18 | 67.4           | 44.99422 | 89.80578  | 33.13331 | 101.66669 |
| 19 | 73.4           | 46.35349 | 100.44651 | 32.03594 | 114.76406 |
| 20 | 79.4           | 47.43177 | 111.36823 | 30.50882 | 128.29118 |
| 21 | 85.4           | 48.24421 | 122.55579 | 28.57513 | 142.22487 |



# Figure 8: Forecasts plot for “control group”

Forecasts from ARIMA(0,2,0)

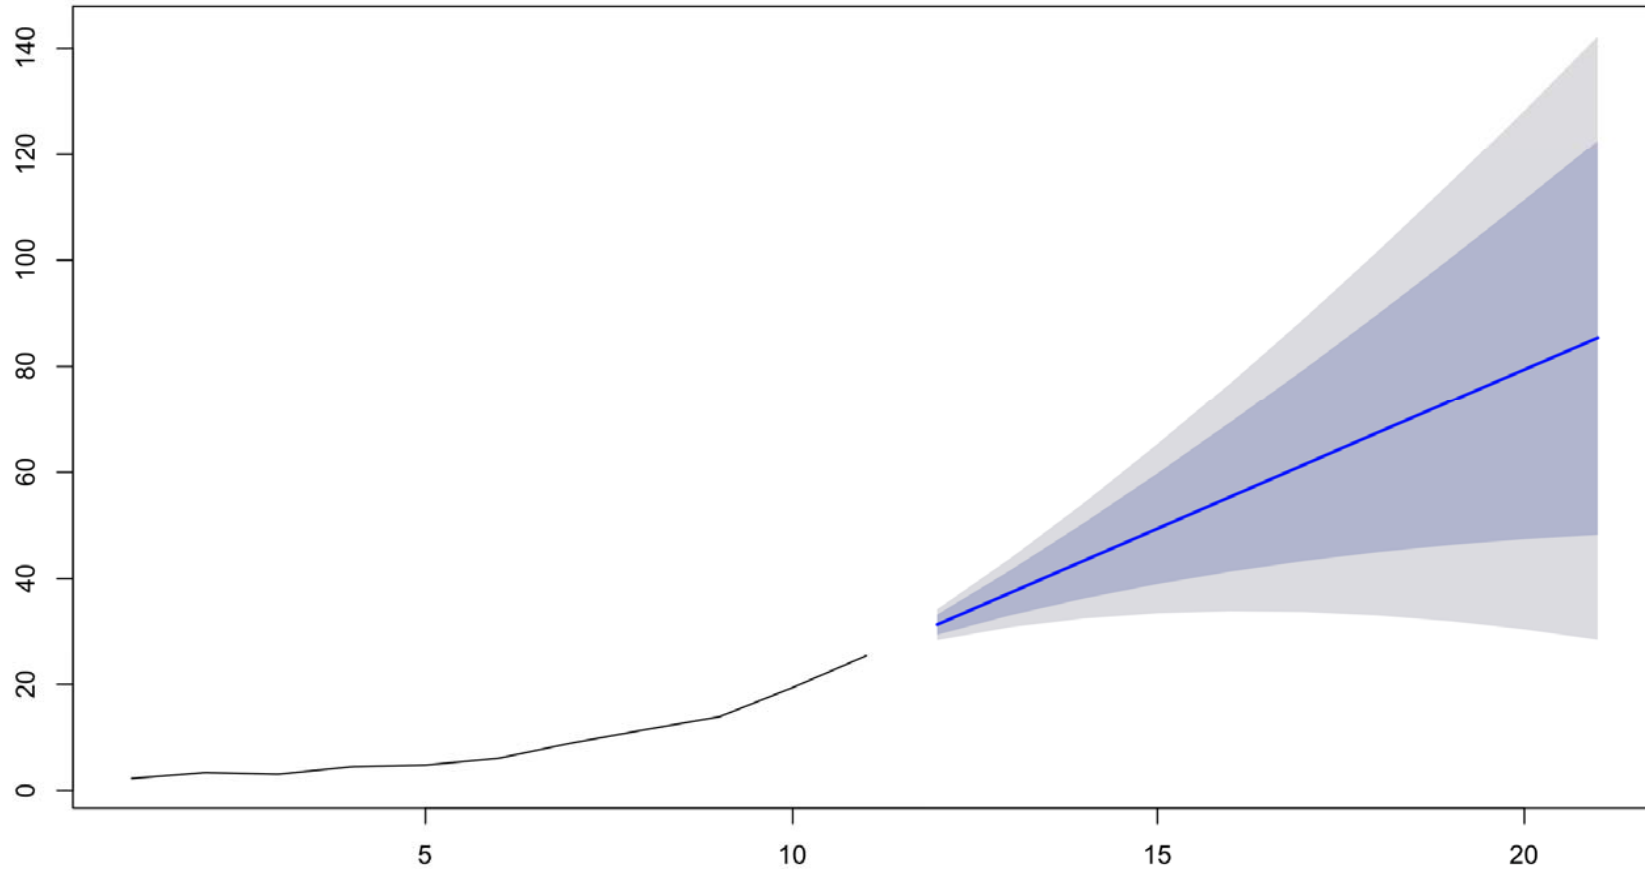

# Figure 9: Autocorrelations of residuals for ARIMA (1,0,1) applied to “antimalarial drugs group”

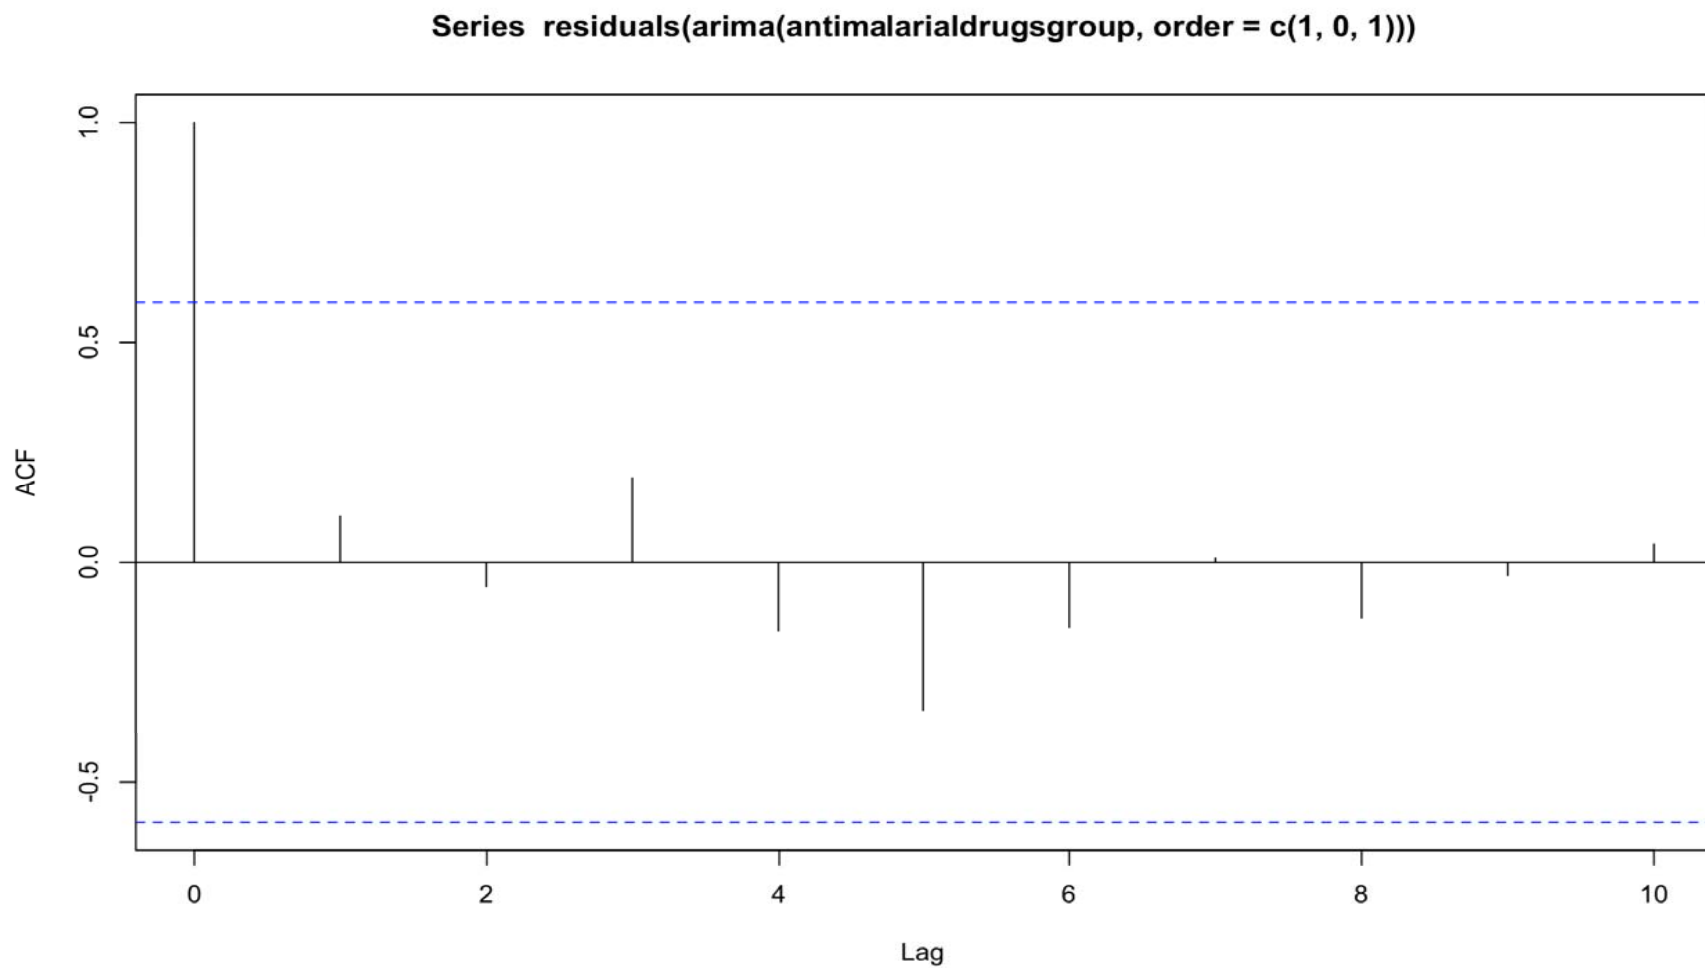

# Figure 10: Autocorrelations of residuals for ARIMA (0,2,0) applied to “control group”

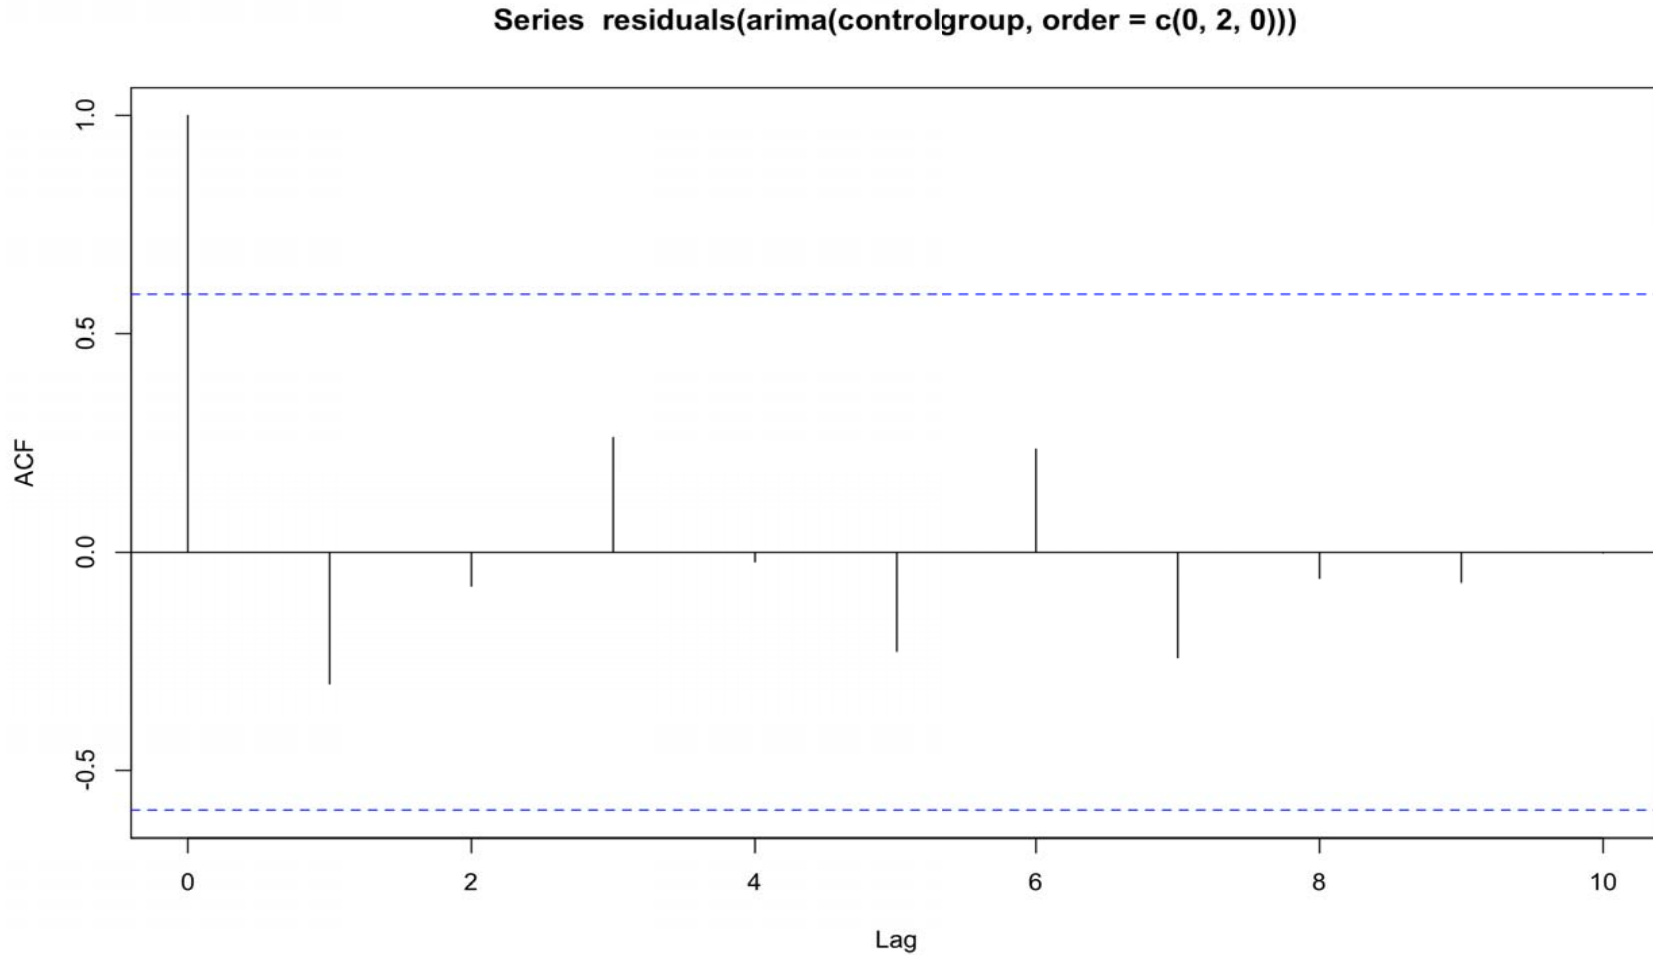

Source: https://medrxiv.org/content/10.1101/2020.04.18.20063875v2.full.pdf
